# Supplementary material for: Tracking hematopoietic precursor division ex vivo in real time
Source: PubMed Central journal article supplement (PMC5781326; doi:10.1186/s13287-017-0767-z), 2018-01-23
Supplement: 13287_2017_767_MOESM5_ESM.pdf [file 13287_2017_767_MOESM5_ESM.pdf]

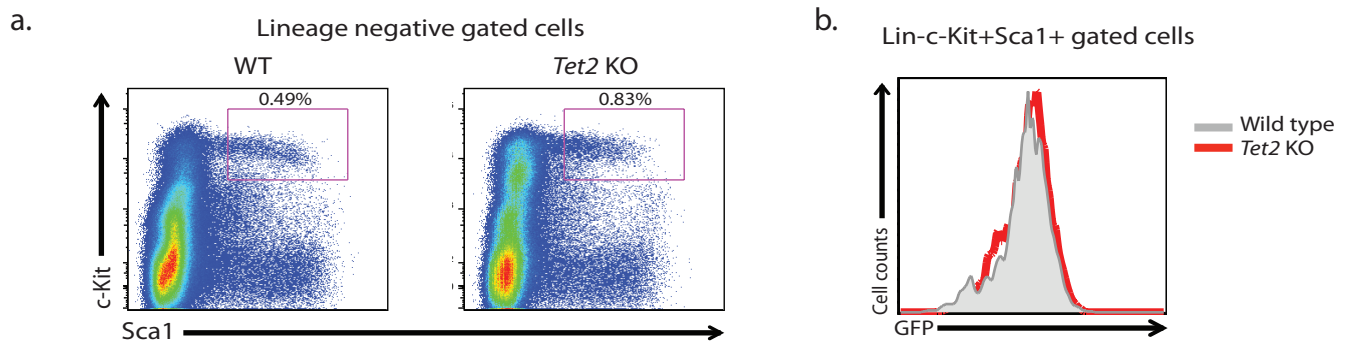

**Figure S2. *Tet2* loss leads to increased hematopoietic stem cell in mouse bone marrow**

(a) The representative data of FACS analysis of wild type and *Tet2* knockout HSCs. The cells were stained with antibodies to lineage, Sca1 and c-Kit markers. The lineage negative population was gated first. Numbers indicate percent cells within Lin-c-Kit+Sca1+ gates.

(b) The representative FACS data of GFP+ population from wild type and *Tet2*<sup>-/-</sup> mouse. The lineage, Sca1 and c-Kit markers were stained and gated first, then The GFP+ population from Lin-Sca1+c-Kit+ was compared between wild type and *Tet2*<sup>-/-</sup> mouse.
