# Supplementary material for: Tracking hematopoietic precursor division ex vivo in real time
Source: PubMed Central journal article supplement (PMC5781326; doi:10.1186/s13287-017-0767-z), 2018-01-23
Supplement: 13287_2017_767_MOESM6_ESM.pdf [file 13287_2017_767_MOESM6_ESM.pdf]

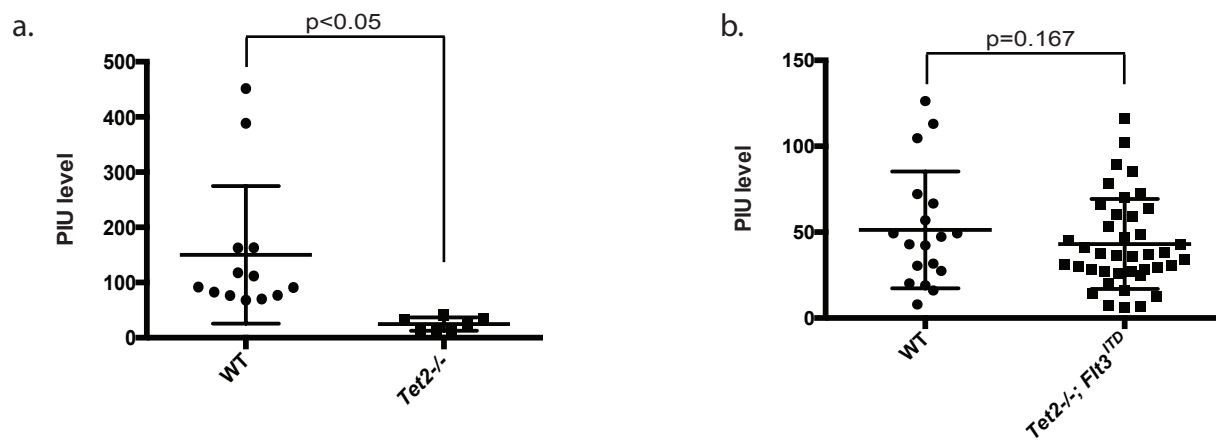

**Figure S3. The fluorescence intensity of dividing *Tet2*<sup>-/-</sup> and *Tet2*<sup>-/-</sup>; *Flt3*<sup>ITD</sup> dividing HSCs.**  
 (a) The GFP pixel intensity unit (PIU) of *Tet2*<sup>-/-</sup> dividing HSC was compared to wild type control.  
 (b) The GFP pixel intensity unit (PIU) of *Tet2*<sup>-/-</sup>; *Flt3*<sup>ITD</sup> dividing HSC was compared to wild type control.
